# Supplementary material for: Comparative effectiveness of adjunct non-pharmacological interventions on maternal and neonatal outcomes in gestational diabetes mellitus patients: A systematic review and network meta-analysis protocol of randomized controlled trials
Source: PubMed Central journal article supplement (PMC8794170; doi:10.1371/journal.pone.0263336), 2022-01-27
Supplement: pone.0263336.s003.pdf [file pone.0263336.s003.pdf]

# Proposed data abstraction form

Intervention review of randomized controlled trials

Title: Comparative effectiveness of adjunct non-pharmacological interventions on maternal and neonatal outcomes in gestational diabetes mellitus patients: A systematic review and network meta-analysis protocol of randomized controlled trials.

Use this form to abstract data from each of the studies included in the review.

Author: Dr. Sumanta Saha

\* Required

## Reviewer author's detail

1. Name \*

---

2. Date of data abstraction \*

---

*Example: January 7, 2019*

3. Email id \*

---

## Is the study population eligible for inclusion in this review?

4. What is diagnosis of trial participants? \*

*Mark only one oval.*

Gestational diabetes melitus

Other: \_\_\_\_\_

## Is the study design eligible for inclusion in this review?

5. What is the design of the study? \*

*Mark only one oval.*

Randomized controlled trial

Other

## Study details

Please enter the details from respective trials

6. Last name of the first author of the publication \*

---

7. Year of publication \*

---

8. Digital object identifier (if available)

---

9. PMID (if available)

---

10. Web link

If a PMID or DOI is not available for a study, copy the electronic link of the study from your browser and paste it here.

---

11. Enlist the country or countries where the trial got conducted. \*

if conducted in multiple countries, first mention the number of countries and then enlist their names (separated by comma) in the next line.

---

---

---

---

---

12. Name the continent where the trial was conducted \*

if conducted in multiple countries, first mention the number of countries and then enlist their names (separated by comma) in the next line

*Mark only one oval.*

- Asia
- Africa
- North America
- South America
- Europe
- More than one continent

13. Trial registration no.

---

14. The trial is

*Mark only one oval.*

- Single centered
- Multicentered
- Other: \_\_\_\_\_

15. Trial duration (in weeks)

---

16. Is funding information available in the article?

*Mark only one oval.*

- Yes  
 No  
 Other: \_\_\_\_\_

17. Was ethical clearance obtained for conducting the trial?

*Mark only one oval.*

- Yes  
 No  
 Other: \_\_\_\_\_

18. Was participant consent obtained from the trial participants?

*Mark only one oval.*

- Yes  
 No  
 Other: \_\_\_\_\_

19. Which diagnostic criteria got used to diagnose gestational diabetes mellitus?

*Mark only one oval.*

- American Diabetes Association  
 International Association of Diabetes and Pregnancy Study Groups criteria  
 Carpenter and Coustan's criteria  
 European Diabetic Pregnancy Study Group  
 Other: \_\_\_\_\_

20. What was the gestational age of participants (in weeks) when they were recruited in the trial?

Mention in weeks. E.g., if gestational age of participant recruitment in the trial was 24-28 weeks, mention '24-28.'

\_\_\_\_\_

21. Did the study population include women with a previous history of gestational diabetes mellitus?

*Mark only one oval.*

- Yes  
 No  
 Unclear  
 Other: \_\_\_\_\_

Type of intervention studied in the trial

22. Choose the type of intervention studied in the trial

If a combination of the following interventions were tested, mention the those in the 'Other' option

*Check all that apply.*

- Nutritional supplementation
- Digital intervention/s
- Structured supervised exercise program
- Structured educational and/or counseling service

Other:  \_\_\_\_\_

Data of nutritional supplement receiving arm/s

Skip this section if the trial didn't test this intervention

23. No. of arms

\_\_\_\_\_

Arm 1

24. Intervention received

\_\_\_\_\_

25. Intervention dosage and regimen

\_\_\_\_\_  
\_\_\_\_\_  
\_\_\_\_\_  
\_\_\_\_\_

26. How many participants got randomized?

\_\_\_\_\_

27. No. of males

\_\_\_\_\_

28. Mean age (years, standard deviation)

\_\_\_\_\_

Arm 2

Skip if one treatment arm tested this intervention type.

29. Intervention received

\_\_\_\_\_

30. Intervention dosage and regimen

---

---

---

---

---

31. How many participants got randomized?

---

32. No. of males

---

33. Mean age (years, standar deviation)

---

**Arm 3**

Skip if one treatment arm tested this intervention type.

34. Intervention received

---

35. Intervention dosage and regimen

---

---

---

---

---

36. How many participants got randomized?

---

37. No. of males

---

38. Mean age (years, standar deviation)

---

**Arm 4 onwards**

Use this section if four or more treatment arms received the intervention type (enter the detail of respective treatment arms in separate lines).

39. Intervention received

---

---

---

---

---

40. Intervention dosage and regimen

---

---

---

---

---

41. How many participants got randomized?

---

---

---

---

---

42. No. of males

---

---

---

---

---

43. Mean age (years, standar deviation)

---

---

---

---

---

Data of digital intervention receiving arm/s

Skip this section if the trial didn't test this intervention

44. No. of arms

---

Arm 1

45. Intervention received

---

46. Intervention dosage and regimen

---

---

---

---

---

47. How many participants got randomized?

---

48. No. of males

---

49. Mean age (years, standar deviation)

---

**Arm 2**

Skip if one treatment arm tested this intervention type.

50. Intervention received

---

51. Intervention dosage and regimen

---

---

---

---

---

52. How many participants got randomized?

---

53. No. of males

---

54. Mean age (years, standar deviation)

---

**Arm 3**

Skip if one treatment arm tested this intervention type.

55. Intervention received

---

56. Intervention dosage and regimen

---

---

---

---

---

57. How many participants got randomized?

---

58. No. of males

---

59. Mean age (years, standar deviation)

---

**Arm 4 onwards**

Use this section if four or more treatment arms received the intervention type (enter the detail of respective treatment arms in separate lines).

60. Intervention received

---

---

---

---

---

61. Intervention dosage and regimen

---

---

---

---

---

62. How many participants got randomized?

---

---

---

---

---



63. No. of males

---

---

---

---

---

64. Mean age (years, standar deviation)

---

---

---

---

---

Data of structured supervised exercise program receiving arm/s

Skip this section if the trial didn't test this intervention

65. No. of arms

---

**Arm 1**

66. Intervention received

---

67. Intervention dosage and regimen

---

---

---

---

---

68. How many participants got randomized?

---

69. No. of males

---

70. Mean age (years, standar deviation)

---

**Arm 2**

Skip if one treatment arm tested this intervention type.

71. Intervention received

---

72. Intervention dosage and regimen

---

---

---

---

73. How many participants got randomized?

---

74. No. of males

---

75. Mean age (years, standar deviation)

---

**Arm 3**

Skip if one treatment arm tested this intervention type.

76. Intervention received

---

77. Intervention dosage and regimen

---

---

---

---

78. How many participants got randomized?

---

79. No. of males

---

80. Mean age (years, standar deviation)

---

**Arm 4 onwards**

Use this section if four or more treatment arms received the intervention type (enter the detail of respective treatment arms in separate lines).

81. Intervention received

---

---

---

---

---

82. Intervention dosage and regimen

---

---

---

---

---

83. How many participants got randomized?

---

---

---

---

---

84. No. of males

---

---

---

---

---

85. Mean age (years, standar deviation)

---

---

---

---

---

Data of structured educational and/or counseling service receiving arm/s

Skip this section if the trial didn't test this intervention

86. No. of arms

---

Arm 1

87. Intervention received

---

88. Intervention dosage and regimen

---

---

---

---

---

89. How many participants got randomized?

---

90. No. of males

---

91. Mean age (years, standar deviation)

---

**Arm 2**

Skip if one treatment arm tested this intervention type.

92. Intervention received

---

93. Intervention dosage and regimen

---

---

---

---

---

94. How many participants got randomized?

---

95. No. of males

---

96. Mean age (years, standar deviation)

---

**Arm 3**

Skip if one treatment arm tested this intervention type.

97. Intervention received

---

98. Intervention dosage and regimen

---

---

---

---

---

99. How many participants got randomized?

---

100. No. of males

---

101. Mean age (years, standar deviation)

---

**Arm 4 onwards**

Use this section if four or more treatment arms received the intervention type (enter the detail of respective treatment arms in separate lines).

102. Intervention received

---

---

---

---

---

103. Intervention dosage and regimen

---

---

---

---

---

104. How many participants got randomized?

---

---

---

---

---

105. No. of males

---

---

---

---

---

106. Mean age (years, standar deviation)

---

---

---

---

---

Data of treatment arm/s receiving a combination of any of the above interventions

Skip this section if the trial didn't test this intervention

107. No. of arms

---

**Arm 1**

108. Intervention received

---

109. Intervention dosage and regimen

---

---

---

---

---

110. How many participants got randomized?

---

111. No. of males

---

112. Mean age (years, standar deviation)

---

**Arm 2**

Skip if one treatment arm tested this intervention type.

113. Intervention received

---

114. Intervention dosage and regimen

---

---

---

---

---

115. How many participants got randomized?

---

116. No. of males

---

117. Mean age (years, standar deviation)

---

**Arm 3**

Skip if one treatment arm tested this intervention type.

118. Intervention received

---

119. Intervention dosage and regimen

---

---

---

---

---

120. How many participants got randomized?

---

121. No. of males

---

122. Mean age (years, standar deviation)

---

**Arm 4 onwards**

Use this section if four or more treatment arms received the intervention type (enter the detail of respective treatment arms in separate lines).

123. Intervention received

---

---

---

---

---

124. Intervention dosage and regimen

---

---

---

---

---

125. How many participants got randomized?

---

---

---

---

---

126. No. of males

---

---

---

---

---

127. Mean age (years, standar deviation)

---

---

---

---

---

Data of placebo and/or no intervention receiving arm

128. Intervention received

---

129. Intervention dosage and regimen

---

---

---

---

---



130. How many participants got randomized?

---

131. No. of males

---

132. Mean age (years, standar deviation)

---

### Outcome data

133. Select (tick) outcomes reported in this study. \*

*Check all that apply.*

|                                | Reported                 | Not reported             |
|--------------------------------|--------------------------|--------------------------|
| Cesarean section               | <input type="checkbox"/> | <input type="checkbox"/> |
| Pre-eclampsia                  | <input type="checkbox"/> | <input type="checkbox"/> |
| Polyhydramnios                 | <input type="checkbox"/> | <input type="checkbox"/> |
| Preterm birth                  | <input type="checkbox"/> | <input type="checkbox"/> |
| Macrosomia                     | <input type="checkbox"/> | <input type="checkbox"/> |
| Prolonged labour               | <input type="checkbox"/> | <input type="checkbox"/> |
| Gestational hypertension       | <input type="checkbox"/> | <input type="checkbox"/> |
| Premature rupture of membranes | <input type="checkbox"/> | <input type="checkbox"/> |
| Neonatal hypoglycemia          | <input type="checkbox"/> | <input type="checkbox"/> |
| Newborn hyperbilirubinemia     | <input type="checkbox"/> | <input type="checkbox"/> |
| Congenital anomaly             | <input type="checkbox"/> | <input type="checkbox"/> |
| Apgar scores at 1 min          | <input type="checkbox"/> | <input type="checkbox"/> |
| Apgar scores at 5 min          | <input type="checkbox"/> | <input type="checkbox"/> |
| Birth weight                   | <input type="checkbox"/> | <input type="checkbox"/> |
| Birth length                   | <input type="checkbox"/> | <input type="checkbox"/> |
| Gestational age at birth       | <input type="checkbox"/> | <input type="checkbox"/> |
| Neonatal Corpulence Index      | <input type="checkbox"/> | <input type="checkbox"/> |

This content is neither created nor endorsed by Google.

Google Forms
