# Supplementary material for: Comparative effectiveness of adjunct non-pharmacological interventions on maternal and neonatal outcomes in gestational diabetes mellitus patients: A systematic review and network meta-analysis protocol of randomized controlled trials
Source: PubMed Central journal article supplement (PMC8794170; doi:10.1371/journal.pone.0263336), 2022-01-27
Supplement: pone.0263336.s004.pdf [file pone.0263336.s004.pdf]

## **Data abstraction form for analysis**

**Title: Comparative effectiveness of adjunct non-pharmacological interventions on maternal and neonatal outcomes in gestational diabetes mellitus patients: A systematic review and network meta-analysis protocol of randomized controlled trials.**

**Draft copy**

**Author: Dr. Sumanta Saha**

Dichotomous outcomes

| <b>First author's last name</b> | <b>Year of publication</b> | <b>Title of the study</b> | <b>Outcome</b> | <b>Intervention given in the treatment arm</b> | <b>Events</b> | <b>Total participants (included in the analysis)</b> | <b>DOI</b> | <b>PMID</b> |
|---------------------------------|----------------------------|---------------------------|----------------|------------------------------------------------|---------------|------------------------------------------------------|------------|-------------|
|                                 |                            |                           |                |                                                |               |                                                      |            |             |
|                                 |                            |                           |                |                                                |               |                                                      |            |             |
|                                 |                            |                           |                |                                                |               |                                                      |            |             |
|                                 |                            |                           |                |                                                |               |                                                      |            |             |
|                                 |                            |                           |                |                                                |               |                                                      |            |             |
|                                 |                            |                           |                |                                                |               |                                                      |            |             |
|                                 |                            |                           |                |                                                |               |                                                      |            |             |
|                                 |                            |                           |                |                                                |               |                                                      |            |             |
|                                 |                            |                           |                |                                                |               |                                                      |            |             |
|                                 |                            |                           |                |                                                |               |                                                      |            |             |
|                                 |                            |                           |                |                                                |               |                                                      |            |             |
|                                 |                            |                           |                |                                                |               |                                                      |            |             |
|                                 |                            |                           |                |                                                |               |                                                      |            |             |
|                                 |                            |                           |                |                                                |               |                                                      |            |             |
|                                 |                            |                           |                |                                                |               |                                                      |            |             |
|                                 |                            |                           |                |                                                |               |                                                      |            |             |
|                                 |                            |                           |                |                                                |               |                                                      |            |             |
|                                 |                            |                           |                |                                                |               |                                                      |            |             |
|                                 |                            |                           |                |                                                |               |                                                      |            |             |
|                                 |                            |                           |                |                                                |               |                                                      |            |             |
|                                 |                            |                           |                |                                                |               |                                                      |            |             |
|                                 |                            |                           |                |                                                |               |                                                      |            |             |
|                                 |                            |                           |                |                                                |               |                                                      |            |             |
|                                 |                            |                           |                |                                                |               |                                                      |            |             |
